# Supplementary material for: A terbium-functionalized ZIF-8 nanosensor for rapid and sensitive detection of an anthrax spore biomarker
Source: Royal Society of Chemistry journal article supplement (doi:10.1039/d3nj04760a), 2023-12-18
Supplement: d3nj04760a1.pdf [file d3nj04760a1.pdf]

## Supplementary materials

### **Terbium functionalized ZIF-8 nanosensor for rapid and sensitive detection of anthrax spore biomarker**

*Xurong Zuo<sup>a</sup>, Pengfei Liu<sup>a</sup>, Qin hao Sun<sup>a</sup>, Jiahui Huang<sup>a</sup>, Yuwei Zhang<sup>a</sup>, Xuecheng Zhu<sup>a</sup>, Runqi Chen<sup>a</sup>, Xiangyu Meng<sup>a,b\*</sup>*

<sup>a</sup> School of Materials Science and Engineering, Linyi University, Linyi 276000, P. R. China

<sup>b</sup> Key Laboratory of Advanced Biomaterials and Nanomedicine in Universities of Shandong, Linyi University, Linyi 276000, P. R. China

**\* Corresponding author:**

Dr. Xiangyu Meng, E-mail address: mengxiangyu1@lyu.edu.cn

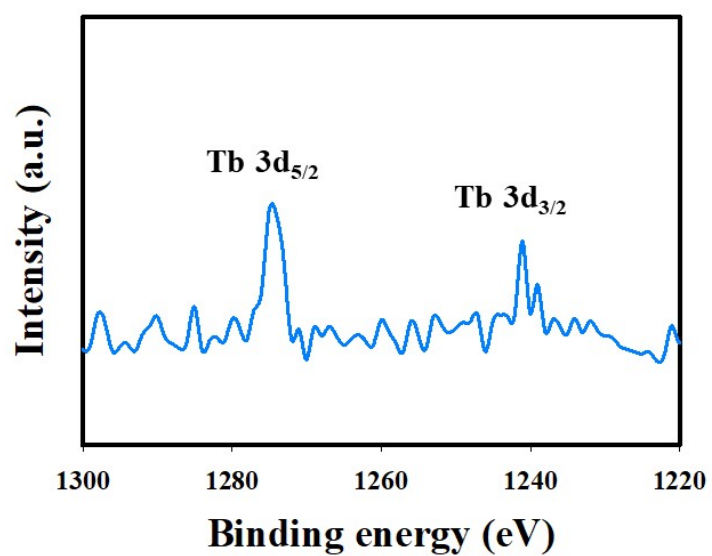

**Figure S1** The high-resolution XPS spectrum of Tb 3d of ZIF-8@Tb-TA.

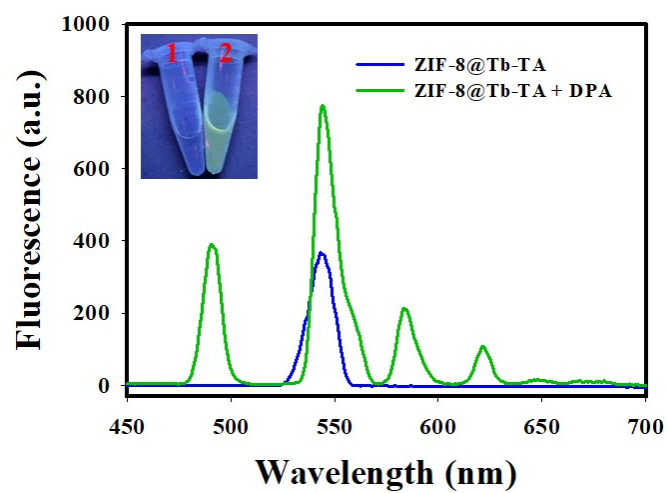

**Figure S2** The emission spectra of ZIF-8@Tb-TA and ZIF-8@Tb-TA in the presence of DPA ( $4 \mu\text{mol L}^{-1}$ ).

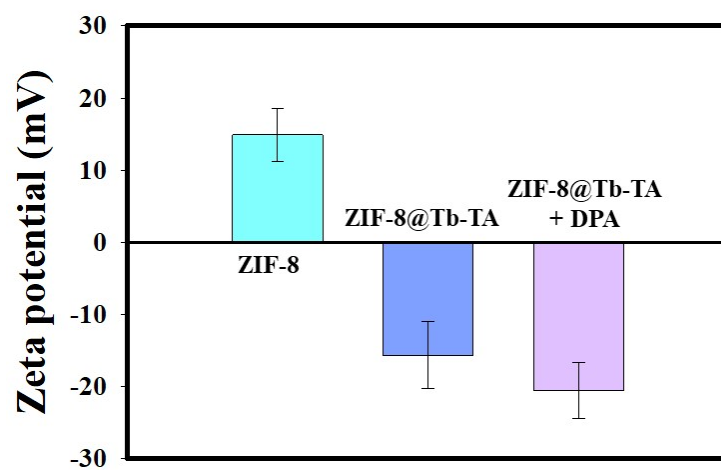

**Figure S3** Zeta potential of ZIF-8, ZIF-8@Tb-TA, and ZIF-8@Tb-TA + 10  $\mu\text{mol L}^{-1}$  of DPA.

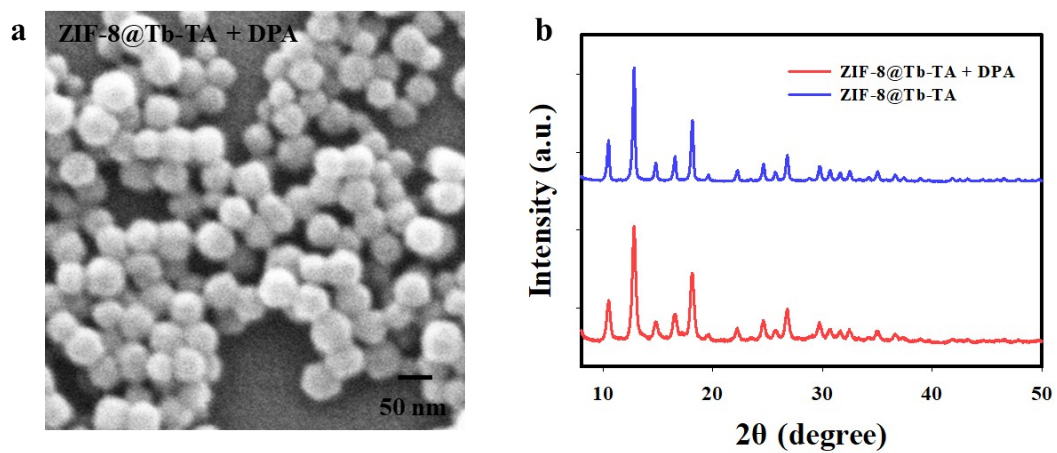

**Figure S4** (a) SEM images of ZIF-8@Tb-TA with  $10 \mu\text{mol L}^{-1}$  of DPA, (b) XRD patterns of ZIF-8@Tb-TA before and after reacting with  $10 \mu\text{mol L}^{-1}$  of DPA for 3 min.

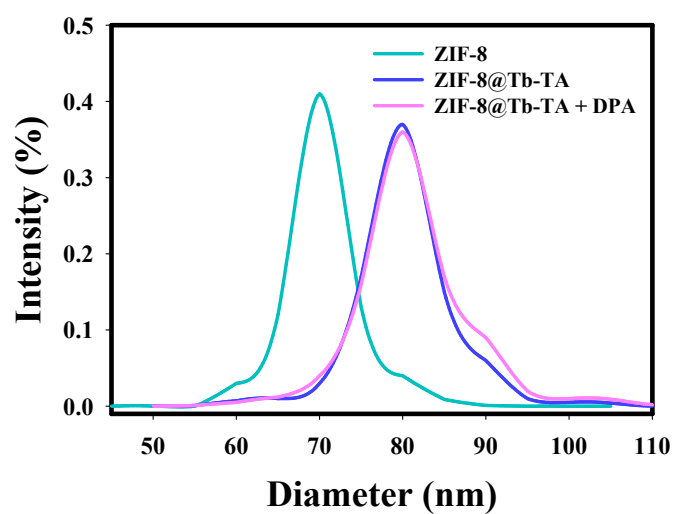

**Figure S5** Diameter change of ZIF-8@Tb-TA after incubation with  $10 \mu\text{mol L}^{-1}$  of DPA.

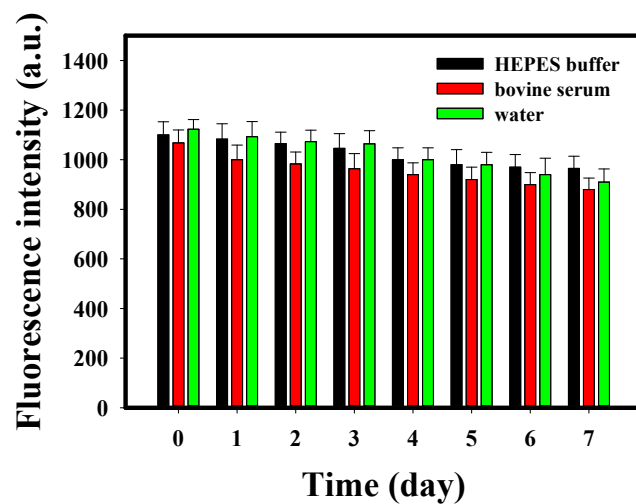

**Figure S6** Changes in fluorescence of ZIF-8@Tb-TA for DPA detection after immersion in different media for various periods.

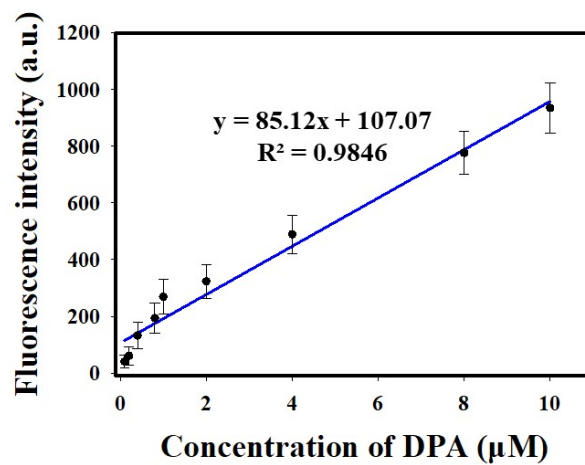

**Figure S7** Linear relationship of fluorescence intensity and DPA concentration in simulated actual samples.



**Table S1** Summary of the current DPA-sensing nanoplatforms.

| Nanoprobe                              | Linear Range    | Detection Limit | Reference  |
|----------------------------------------|-----------------|-----------------|------------|
| pSiNPs-Tb                              | 0-10 $\mu$ M    | 1250 nM         | [1]        |
| Eu/Tb-MOF                              | 0-600 $\mu$ M   | 248 nM          | [2]        |
| CDs-Tb                                 | 0.5-6 $\mu$ M   | 35.9 nM         | [3]        |
| His@ZIF-8/Tb <sup>3+</sup>             | 0.08-10 $\mu$ M | 0.02 $\mu$ M    | [4]        |
| Fe <sub>3</sub> O <sub>4</sub> -Tb NPs | 0.02-1 $\mu$ M  | 5.4 nM          | [5]        |
| Tb-PTA-OH                              | 0.05-6 $\mu$ M  | 13.4 nM         | [6]        |
| ZIF-8@Tb-TA                            | 0-12 $\mu$ M    | 12.3 nM         | This study |

[1] Y. Jung, S. Kang, J. An, J. Jung, D. Kim, *Dyes Pigments* 182 (2020) 108700-108718.

[2] M.L. Shen, B. Liu, L. Xu, H. Jiao, *J. Mater. Chem. C*, 2020, **8**, 4392-4400.

[3] L.N. Zhang, Z.W. Wang, J.B. Zhang, C.L. Shi, X.L. Sun, D. Zhao, B.Z. Liu, *Nanomaterials*, 2019, **9**, 1234-1241.

[4] L. Guo, M. Liang, X. Wang, R. Kong, G. Chen, L. Xia, F. Qu, *Chem Sci.*, 2020, **11**, 2407-2413.

[5] T.M. Koo, M.J. Ko, B.C. Park, M.S. Kim, Y.K. Kim, *J Hazard Mater.*, 2021, **408**, 124870-124877.

[6] L. Yu, L. Feng, L. Xiong, S. Li, S. Wang, Z. Wei, Y. Xiao, *J Hazard Mater.*, 2022, **434**, 128914-128923.

**Table S2** Analytical results in simulative real samples.

| Sample     | Concentration<br>( $\mu\text{M}$ ) | Detection<br>( $\mu\text{M}$ ) | Recovery<br>(%) | RSD<br>(%, n = 5) |
|------------|------------------------------------|--------------------------------|-----------------|-------------------|
|            | 0                                  | /                              | /               | /                 |
|            | 0.2                                | 0.19                           | 95.00           | 0.38              |
| 10% bovine | 0.5                                | 0.5                            | 100.00          | 0.23              |
| serum      | 2                                  | 1.99                           | 99.50           | 1.2               |
|            | 5                                  | 4.9                            | 98.00           | 0.93              |
|            | 8                                  | 8.04                           | 100.5           | 1.05              |

/: not detected
